# Supplementary material for: CeO2-supported multi-nuclear NbxSy clusters for hydrogen evolution reaction
Source: Royal Society of Chemistry journal article supplement (doi:10.1039/d3se01241g), 2023-01-01
Supplement: d3se01241g1.pdf [file d3se01241g1.pdf]

# **The CeO<sub>2</sub> supported multi-nuclear Nb<sub>x</sub>S<sub>y</sub> clusters for hydrogen evolution reaction**

Hongxian Liu<sup>\*a</sup>, Chencheng Zhao<sup>a</sup>, Hong Li<sup>a</sup>, Xuelan Li<sup>a</sup>, Xianfeng Mu<sup>a</sup>, Dunhua Hong<sup>a</sup>, Furu Zhong<sup>a</sup>, Zhenxing Fang<sup>\*a</sup>, and Yanning Zhang<sup>\*b</sup>

<sup>a</sup> School of Physics and Electronic Science, Zunyi Normal University, Zunyi 563000, Guizhou, China

<sup>b</sup> Institute of Fundamental and Frontier Sciences, University of Electronic Science and Technology of China, Chengdu 610054, Sichuan, China

Table S1. The calculated cohesive energy.

|                                | $E_c$ (eV/atom) |
|--------------------------------|-----------------|
| 2H-NbS <sub>2</sub>            | -5.50           |
| Nb <sub>3</sub> S <sub>4</sub> | -4.94           |
| Nb <sub>4</sub> S <sub>3</sub> | -4.73           |
| Nb <sub>4</sub> S <sub>4</sub> | -5.06           |

Table S2. The Bader charge and magnetic moment of inner-layer Ce<sup>4+</sup> and reduced Ce<sup>3+</sup> on Nb<sub>x</sub>S<sub>y</sub>/CeO<sub>2</sub>.

|                                                  |                                   | Ce <sup>4+</sup> |      | Ce <sup>3+</sup> |      |
|--------------------------------------------------|-----------------------------------|------------------|------|------------------|------|
| Nb <sub>3</sub> S <sub>4</sub> /CeO <sub>2</sub> | Bader charge (e)                  | 9.60             | 9.89 | 9.90             | 9.89 |
|                                                  | Magnetic moment (μ <sub>B</sub> ) | 0.00             | 0.96 | 0.97             | 0.96 |
| Nb <sub>4</sub> S <sub>3</sub> /CeO <sub>2</sub> | Bader charge (e)                  | 9.60             | 9.94 | 9.93             | 9.94 |
|                                                  | Magnetic moment (μ <sub>B</sub> ) | 0.00             | 0.95 | 0.96             | 0.96 |
| Nb <sub>4</sub> S <sub>4</sub> /CeO <sub>2</sub> | Bader charge (e)                  | 9.60             | 9.87 | 9.88             |      |
|                                                  | Magnetic moment (μ <sub>B</sub> ) | 0.00             | 0.97 | 0.97             |      |

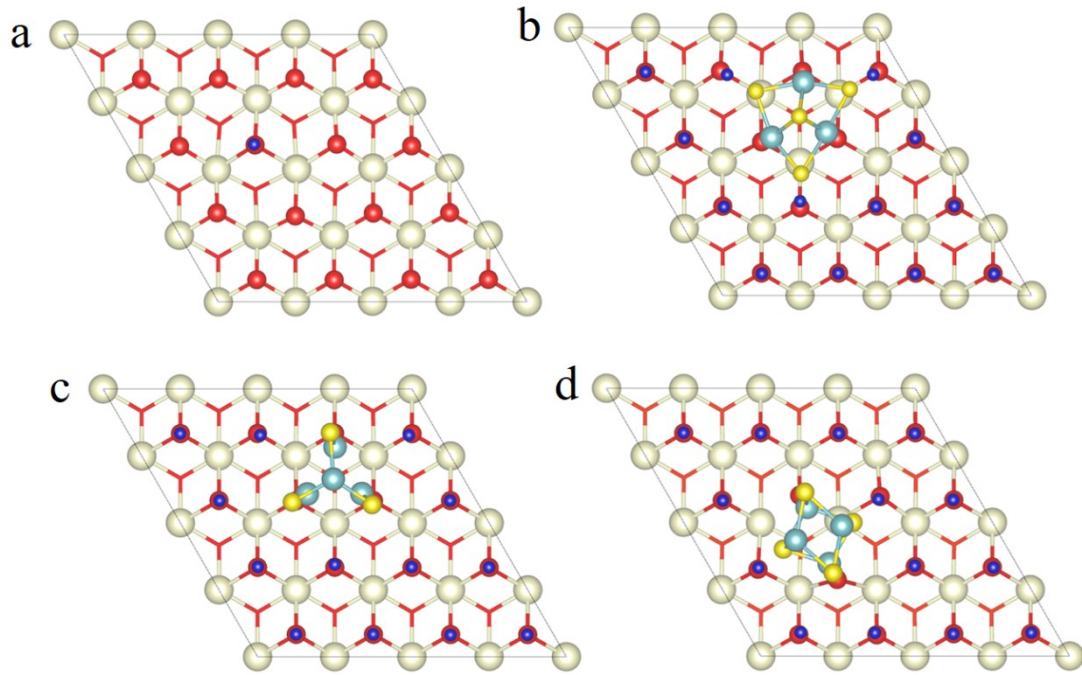

Figure S1. The optimized structures with different coverage of H atoms. (a) the CeO<sub>2</sub> with 6.25% coverage, (b) the CeO<sub>2</sub>+Nb<sub>3</sub>S<sub>4</sub> with 100% coverage, (c) the CeO<sub>2</sub>+Nb<sub>4</sub>S<sub>3</sub> with 100% coverage, (d) the CeO<sub>2</sub>+Nb<sub>4</sub>S<sub>4</sub> with 100% coverage.

Table S3. The  $Ce^{3+}$  of  $CeO_2+Nb_xS_y$  with different H coverage.

| coverage                       | 0%               | 6.25% | 0%                                               | 100% | 0%                                               | 100% | 0%                                               | 100% |
|--------------------------------|------------------|-------|--------------------------------------------------|------|--------------------------------------------------|------|--------------------------------------------------|------|
| $\mu_B$                        | CeO <sub>2</sub> |       | CeO <sub>2</sub> +Nb <sub>3</sub> S <sub>4</sub> |      | CeO <sub>2</sub> +Nb <sub>4</sub> S <sub>3</sub> |      | CeO <sub>2</sub> +Nb <sub>4</sub> S <sub>4</sub> |      |
| Ce <sub>1</sub> <sup>3+</sup>  | -                | 0.97  | 0.96                                             | 0.96 | 0.95                                             | 0.97 | 0.97                                             | 0.97 |
| Ce <sub>2</sub> <sup>3+</sup>  | -                | -     | 0.97                                             | 0.96 | 0.96                                             | 0.97 | 0.97                                             | 0.97 |
| Ce <sub>3</sub> <sup>3+</sup>  | -                | -     | 0.96                                             | 0.96 | 0.96                                             | 0.97 | -                                                | 0.97 |
| Ce <sub>4</sub> <sup>3+</sup>  | -                | -     | -                                                | 0.97 | -                                                | 0.97 | -                                                | 0.97 |
| Ce <sub>5</sub> <sup>3+</sup>  | -                | -     | -                                                | 0.97 | -                                                | 0.97 | -                                                | 0.97 |
| Ce <sub>6</sub> <sup>3+</sup>  | -                | -     | -                                                | 0.96 | -                                                | 0.97 | -                                                | 0.97 |
| Ce <sub>7</sub> <sup>3+</sup>  | -                | -     | -                                                | 0.96 | -                                                | 0.97 | -                                                | 0.97 |
| Ce <sub>8</sub> <sup>3+</sup>  | -                | -     | -                                                | 0.97 | -                                                | 0.97 | -                                                | 0.97 |
| Ce <sub>9</sub> <sup>3+</sup>  | -                | -     | -                                                | 0.97 | -                                                | 0.97 | -                                                | 0.97 |
| Ce <sub>10</sub> <sup>3+</sup> | -                | -     | -                                                | 0.97 | -                                                | 0.97 | -                                                | 0.97 |
| Ce <sub>11</sub> <sup>3+</sup> | -                | -     | -                                                | 0.97 | -                                                | 0.96 | -                                                | 0.97 |
| Ce <sub>12</sub> <sup>3+</sup> | -                | -     | -                                                | 0.97 | -                                                | 0.97 | -                                                | 0.97 |
| Ce <sub>13</sub> <sup>3+</sup> | -                | -     | -                                                | 0.97 | -                                                | 0.97 | -                                                | 0.97 |
| Ce <sub>14</sub> <sup>3+</sup> | -                | -     | -                                                | 0.96 | -                                                | 0.97 | -                                                | 0.97 |
| Ce <sub>15</sub> <sup>3+</sup> | -                | -     | -                                                | 0.96 | -                                                | 0.93 | -                                                | 0.97 |
| Ce <sub>16</sub> <sup>3+</sup> | -                | -     | -                                                | 0.97 | -                                                | 0.96 | -                                                | 0.97 |

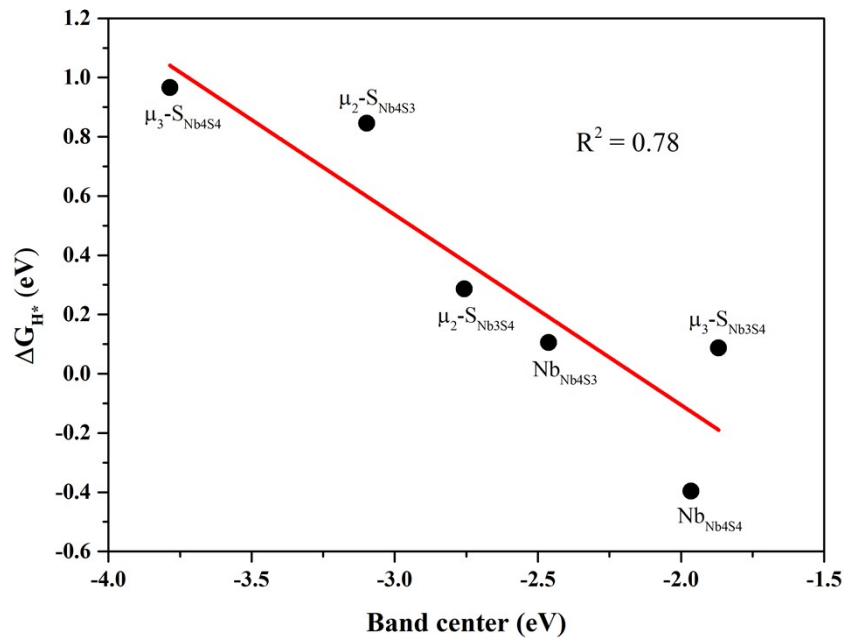

Fig. S2 The relation between  $\Delta G_{H^*}$  and the  $p/d$  band center of edge atoms on  $Nb_xS_y/CeO_2$ .

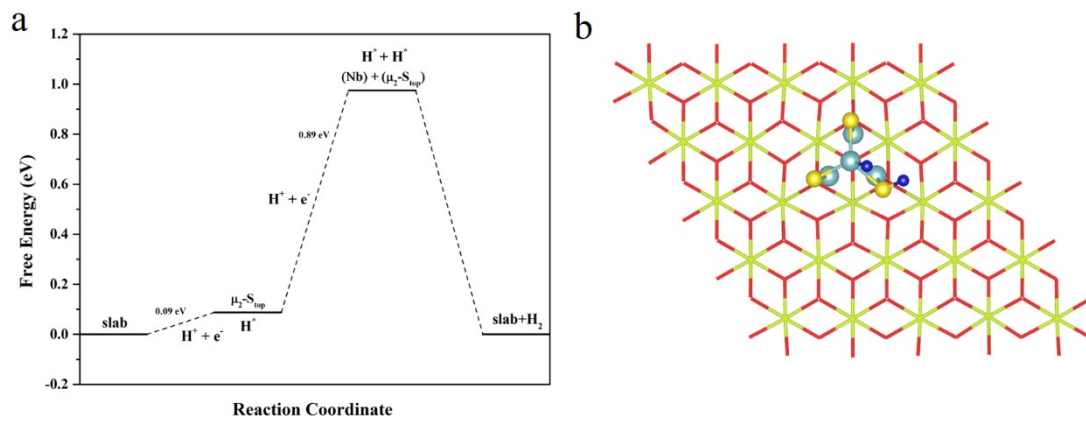

Fig. S3 (a) The calculated reaction pathways with Volmer-Tafel reaction mechanisms of  $\text{Nb}_4\text{S}_3/\text{CeO}_2$  and (b) the optimized structure of  $\text{Nb}_4\text{S}_3/\text{CeO}_2$  with two  $\text{H}^*$  absorption.
